# Supplementary material for: Involvement of PKA/DARPP-32/PP1α and β- arrestin/Akt/GSK-3β Signaling in Cadmium-Induced DA-D2 Receptor-Mediated Motor Dysfunctions: Protective Role of Quercetin
Source: PubMed Central journal article supplement (PMC5802731; doi:10.1038/s41598-018-20342-z), 2018-02-06

**Involvement of PKA/DARPP32/PP1 $\alpha$  and  $\beta$ - arrestin/Akt/Gsk-3 $\beta$  signaling in Cadmium Induced DA-D2 Receptor Mediated Motor dysfunctions: Protective Role of Quercetin**

Richa Gupta<sup>1,2</sup>, Rajendra K. Shukla<sup>1</sup>, Ankita Pandey<sup>1</sup>, Tanuj Sharma<sup>3</sup>, Yogesh Dhuriya<sup>1</sup>, Pranay Srivastava<sup>1</sup>, Manjul P. Singh<sup>2</sup>, Mohammad Imran Siddiqi<sup>3</sup>, AB Pant<sup>1</sup> and Vinay K. Khanna<sup>1</sup>

<sup>1</sup>Developmental Toxicology Laboratory  
Systems Toxicology and Health Risk Assessment Group,  
CSIR-Indian Institute of Toxicology Research, Vishvigyan Bhawan,  
31 Mahatma Gandhi Marg, Lucknow – 226 001,  
Uttar Pradesh, India

<sup>2</sup>School of Pharmacy, Babu Banarsi Das University, Faizabad Road,  
Lucknow – 226 028; Uttar Pradesh; India

<sup>3</sup>Computational Biology Bioinformatics & Chemoinformatics  
CSIR-Central Drug Research Institute  
Sitapur Road, Sector 10 Jankipuram Extension  
Lucknow – 226 031, Uttar Pradesh, India

**\*Corresponding Author**

**Dr. Vinay K. Khanna**  
Senior Principal Scientist  
Developmental Toxicology Laboratory  
System Toxicology and Health Risk Assessment Group  
CSIR-Indian Institute of Toxicology Research  
Lucknow – 226 001, UP (India)  
E-mail: [vkkhanna1@rediffmail.com](mailto:vkkhanna1@rediffmail.com)

Supplementary File 1 - Neuronal Differentiation of Pc12 cells using NGF:

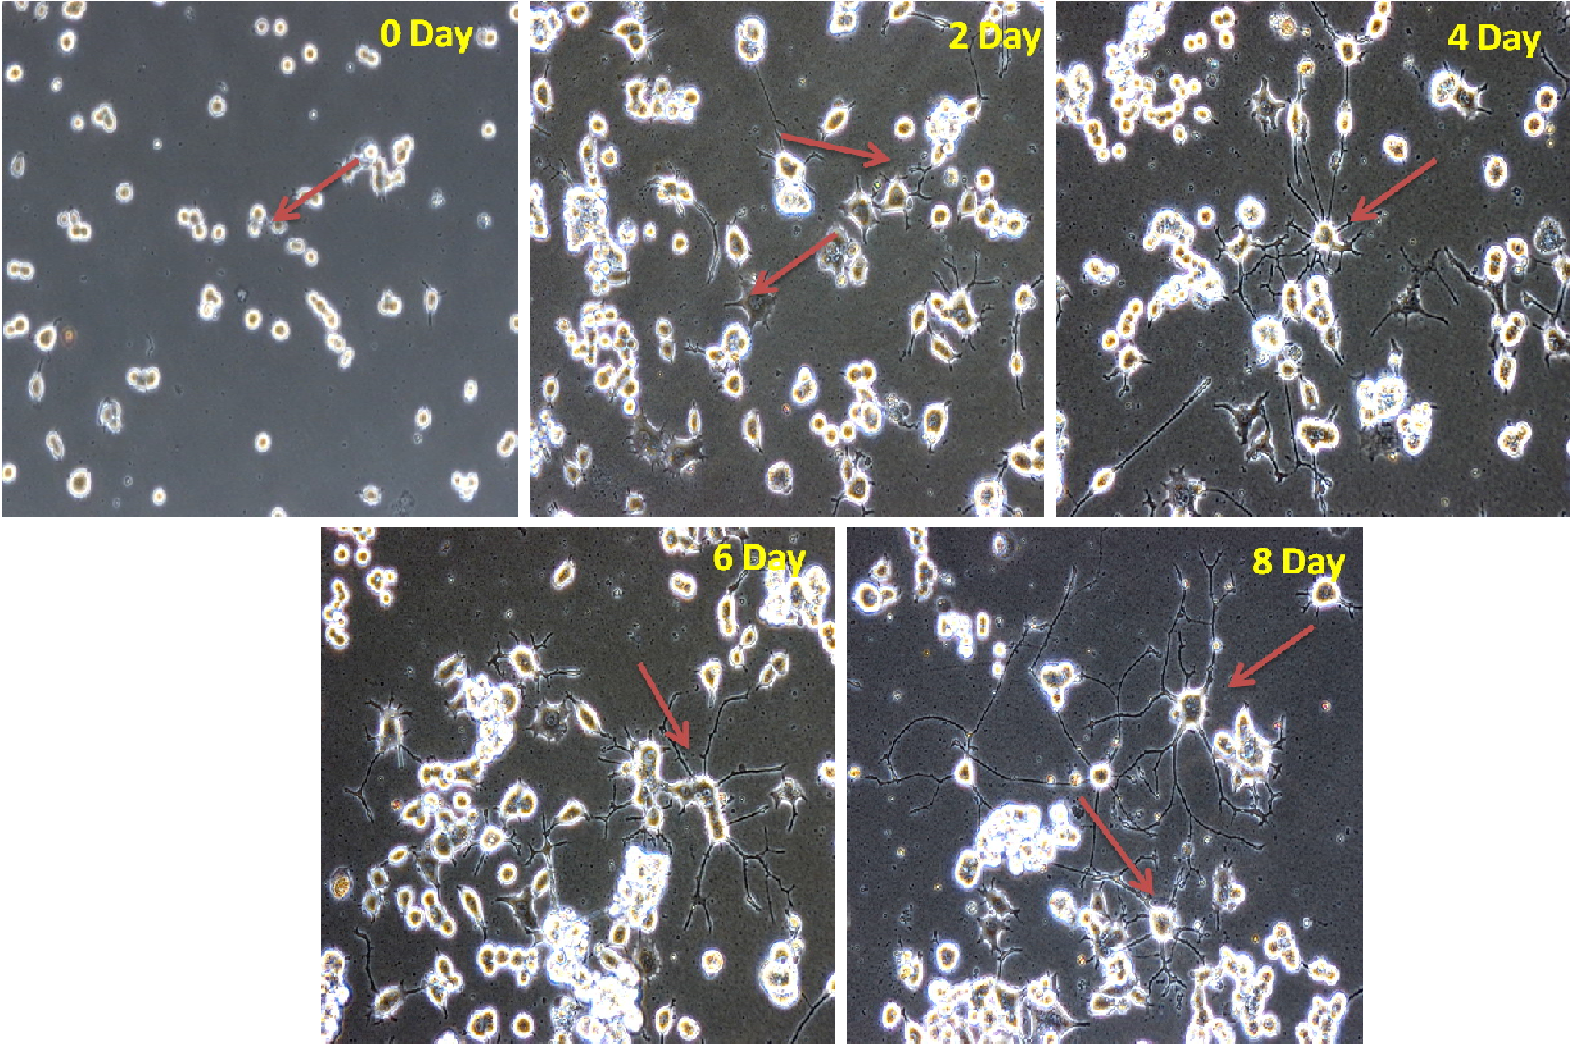

Supplementary File 2- Full Length blot of DARPP32 and GSK 3β

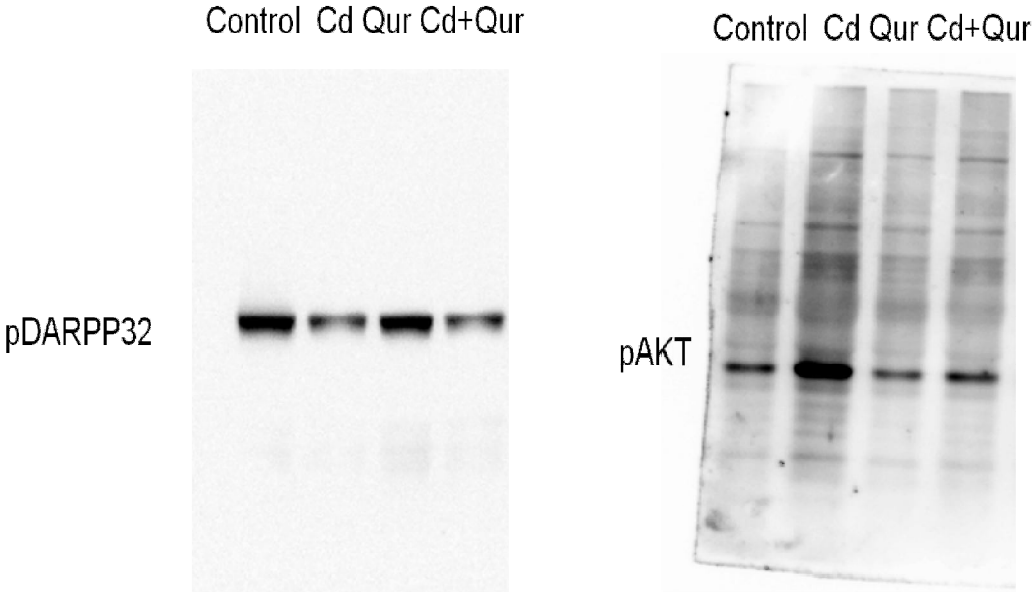

Supplement: 41598_2018_20342_MOESM1_ESM.pdf [file 41598_2018_20342_MOESM1_ESM.pdf]
